# Supplementary material for: Beneath the arctic greening: Will soils lose or gain carbon or perhaps a little of both?
Source: Copernicus journal article supplement (doi:10.5194/soil-2018-41), 2019-01-23
Supplement: Supplementary file 1 [file Harden_Supplemental_submitted.pdf › Harden_Supplemental_submitted.pdf]

# Supplement

## Supplemental Tables

**Table S1. Horizon properties of soils analyzed for radiocarbon based on archive and resampling of profiles HCCN2/3 from O'Donnell et al. (2011); Bodenburg\_fractionated from Clark et al. (2002); DPPR2/3 from Harden et al. (2002).**

*See file TableS1.xlsx.*

**Table S2. Properties of density fractions from soils analysed for radiocarbon based on archive and resampling of profiles HCCN2/3 from O'Donnell et al. (2011); Bodenburg\_fractionated from Clark et al. (2002); DPPR2/3 from Harden et al. (2002).**

*See file TableS2.xlsx.*

**Table S3. Model fits for the depth attenuation of C stored in fractionated and bulk soil organic matter storage for Gelisol, Inceptisol, and Mollisol profiles based on data fits to Eq. 1. Mean and (standard deviation) of profile replicates of bulk soil . Units of Z, cm. Units of C, gC cm<sup>-3</sup>**

| Sample Type       | $Z_{adj}$ | $Z^*$  | $Z_{min}$  | $C^*$        | $C_s$        | $C_{min}$ | Mean $C_{deep}$ | Std $C_{deep}$ |
|-------------------|-----------|--------|------------|--------------|--------------|-----------|-----------------|----------------|
| <u>Gelisol</u>    |           |        |            |              |              |           |                 |                |
| Freelight         | 19.0      | 17.6   | 94.0       | 0.0052       | 0.0142       | 0.0001    | 0.0003          | 0.0002         |
| Occluded          | 19.0      | 13.5   | 94.0       | 0.0041       | 0.0112       | 0.0001    | 0.0001          | 0.00005        |
| Mineral Assoc     | 19.0      | 24.0   | 94.0       | 0.0206       | 0.0559       | 0.0013    | 0.0053          | 0.0018         |
|                   | 24.5      | 18.75  |            | 0.023        | 0.063        | 0.0015    | 0.0076          |                |
| Bulk              | (7.8)     | (8.4)  | 81 (18)    | (.0013)      | (.0036)      | (.0036)   | (0.0028)        | 0.0024 (.0007) |
| <u>Inceptisol</u> |           |        |            |              |              |           |                 |                |
| Freelight         | 0.0       | 15.1   | 80.0       | 0.0038       | 0.0103       | 0.0001    | 0.0001          | NA             |
| Occluded          | 0.0       | 21.6   | 106.0      | 0.0043       | 0.0117       | 0.0001    | 0.0001          | 0.0001         |
| Mineral Assoc     | 0.0       | 50.4   | 106.0      | 0.0272       | 0.0417       | 0.0062    | 0.0062          | 0.0062         |
|                   | 7.9       | 29.08  | 71.27      |              |              | 0.005     | 0.006           |                |
| Bulk              | (5.95)    | (21.1) | (33.7)     | 0.014 (0062) | 0.040 (.017) | (.0038)   | (.0036)         | 0.0027 (.0030) |
| <u>Mollisol</u>   |           |        |            |              |              |           |                 |                |
| Freelight         | 0.0       | 23.7   | 60.0       | 0.0011       | 0.0030       | 0.0003    | 0.0003          | 0.0003         |
| Occluded          | 0.0       | 16.8   | 60.0       | 0.0002       | 0.0006       | 0.00001   | 0.00003         | 0.00003        |
| Mineral Assoc     | 0.0       | 35.2   | 100.0      | 0.0130       | 0.0352       | 0.0020    | 0.0020          | 0.0020         |
|                   |           | 50.48  |            | 0.014        | 0.035        | 0.0021    |                 |                |
| Bulk              | 0         | (17.9) | 160 (84.9) | (.0013)      | (.0055)      | (.0008)   | 0.0019 (NA)     | .0001 (NA)     |

**Table S4. Model fits for the depth attenuation of C turnover (k or 1/Tau) for fractionated soil organic matter based on data-fits to Eq. 1.**

| Soil Fraction     | Zadj | Z-star | Zmin  | k at Z* | k surface | k min   | Mean k<br>deep | Std<br>Taudeep |
|-------------------|------|--------|-------|---------|-----------|---------|----------------|----------------|
| <u>Gelisol</u>    |      |        |       |         |           |         |                |                |
| Freelight         | 19.0 | 25.4   | 151.0 | 0.0003  | 0.0007    | 6.8E-06 | 0.0000         | NA             |
| Occluded          | 19.0 | 32.3   | 151.0 | 0.0004  | 0.0011    | 3.1E-05 | 0.0000         | NA             |
| Mineral Assoc     | 19.0 | 25.4   | 151.0 | 0.0003  | 0.0007    | 6.8E-06 | 0.0000         | NA             |
| Bulk              | 19.0 | 18.9   | 94.0  | 0.0012  | 0.0032    | 2.4E-05 | 0.0000         | 0.0000         |
| <u>Inceptisol</u> |      |        |       |         |           |         |                |                |
| Freelight         | 0.0  | 14.9   | 44.0  | 0.0015  | 0.0040    | 6.0E-04 | 0.0003         | 0.0004         |
| Occluded          | 0.0  | 17.3   | 100.0 | 0.0008  | 0.0022    | 1.0E-05 | 0.0000         | NA             |
| Mineral Assoc     | 0.0  | 30.9   | 110.0 | 0.0006  | 0.0016    | 5.9E-05 | 0.0001         | NA             |
| Bulk              | 0.0  | 8.5    | 30.0  | 0.0044  | 0.0119    | 3.0E-04 | 0.0002         | 0.0001         |
| <u>Mollisol</u>   |      |        |       |         |           |         |                |                |
| Freelight         | 0.0  | 22.3   | 20.0  | 0.0060  | 0.0162    | 1.1E-02 | 0.0147         | 0.0028         |
| Occluded          | 0.0  | 11.5   | 20.0  | 0.0063  | 0.0172    | 5.0E-03 | 0.0050         | NA             |
| Mineral Assoc     | 0.0  | 20.3   | 100.0 | 0.0049  | 0.0133    | 9.8E-05 | 0.0001         | NA             |
| Bulk              | 0.0  | 19.0   | 100.0 | 0.0102  | 0.0278    | 1.2E-04 | NA             | NA             |

Table S5. Correlation coefficients among depth model parameters for %C of bulk soil.

|                                  | <i>Z<sub>adj</sub></i> | <i>Z*</i> | <i>Z*<sub>adj</sub></i> | <i>Z<sub>min</sub></i> | <i>Z<sub>min_adj</sub></i> | <i>C*</i> | <i>C<sub>s</sub></i> | <i>C<sub>min</sub></i> | <i>Mean<br/>C<sub>deep</sub></i> | <i>Std<br/>C<sub>deep</sub></i> | <i>Top<br/>of B</i> | <i>Base<br/>of B</i> | <i>Depth<br/>of<br/>rooting</i> | <i>Depth<br/>of<br/>max<br/>BD</i> |
|----------------------------------|------------------------|-----------|-------------------------|------------------------|----------------------------|-----------|----------------------|------------------------|----------------------------------|---------------------------------|---------------------|----------------------|---------------------------------|------------------------------------|
| <i>Z<sub>adj</sub></i>           | 1                      |           |                         |                        |                            |           |                      |                        |                                  |                                 |                     |                      |                                 |                                    |
| <i>Z*</i>                        | -0.10                  | 1         |                         |                        |                            |           |                      |                        |                                  |                                 |                     |                      |                                 |                                    |
| <i>Z*<sub>adj</sub></i>          | 0.43                   | 0.86      | 1                       |                        |                            |           |                      |                        |                                  |                                 |                     |                      |                                 |                                    |
| <i>Z<sub>min</sub></i>           | -0.25                  | 0.76      | 0.56                    | 1                      |                            |           |                      |                        |                                  |                                 |                     |                      |                                 |                                    |
| <i>Z<sub>min_adj</sub></i>       | -0.05                  | 0.76      | 0.67                    | 0.98                   | 1                          |           |                      |                        |                                  |                                 |                     |                      |                                 |                                    |
| <i>C*</i>                        | -0.39                  | -0.27     | -0.45                   | -0.21                  | -0.30                      | 1         |                      |                        |                                  |                                 |                     |                      |                                 |                                    |
| <i>C<sub>s</sub></i>             | -0.39                  | -0.27     | -0.45                   | -0.21                  | -0.30                      | 1.00      | 1                    |                        |                                  |                                 |                     |                      |                                 |                                    |
| <i>C<sub>min</sub></i>           | 0.02                   | 0.03      | 0.04                    | -0.38                  | -0.39                      | 0.36      | 0.36                 | 1                      |                                  |                                 |                     |                      |                                 |                                    |
| <i>Mean<br/>C<sub>deep</sub></i> | 0.29                   | 0.02      | 0.16                    | -0.35                  | -0.31                      | 0.35      | 0.35                 | 0.95                   | 1                                |                                 |                     |                      |                                 |                                    |
| <i>Std C<sub>deep</sub></i>      | 0.19                   | -0.13     | -0.02                   | -0.36                  | -0.34                      | 0.26      | 0.26                 | 0.90                   | 0.95                             | 1                               |                     |                      |                                 |                                    |
| <i>Top of B</i>                  | -0.24                  | 0.12      | -0.02                   | 0.43                   | 0.41                       | -0.06     | -0.06                | -0.37                  | -0.55                            | -0.53                           | 1                   |                      |                                 |                                    |
| <i>Base of<br/>B</i>             | 0.13                   | 0.17      | 0.22                    | 0.38                   | 0.42                       | -0.28     | -0.28                | -0.31                  | -0.46                            | -0.46                           | 0.15                | 1                    |                                 |                                    |
| <i>Depth of<br/>rooting</i>      | -0.89                  | 0.72      | 0.02                    | 0.82                   | 0.72                       | 0.17      | 0.17                 | -0.33                  | -0.64                            | -0.66                           | 0.77                | -0.76                | 1                               |                                    |
| <i>Depth of<br/>max BD</i>       | -0.49                  | 0.84      | 0.59                    | 0.59                   | 0.54                       | 0.04      | 0.04                 | 0.17                   | 0.08                             | -0.01                           | 0.21                | -0.05                | 0.89                            | 1                                  |

## Supplemental Figures

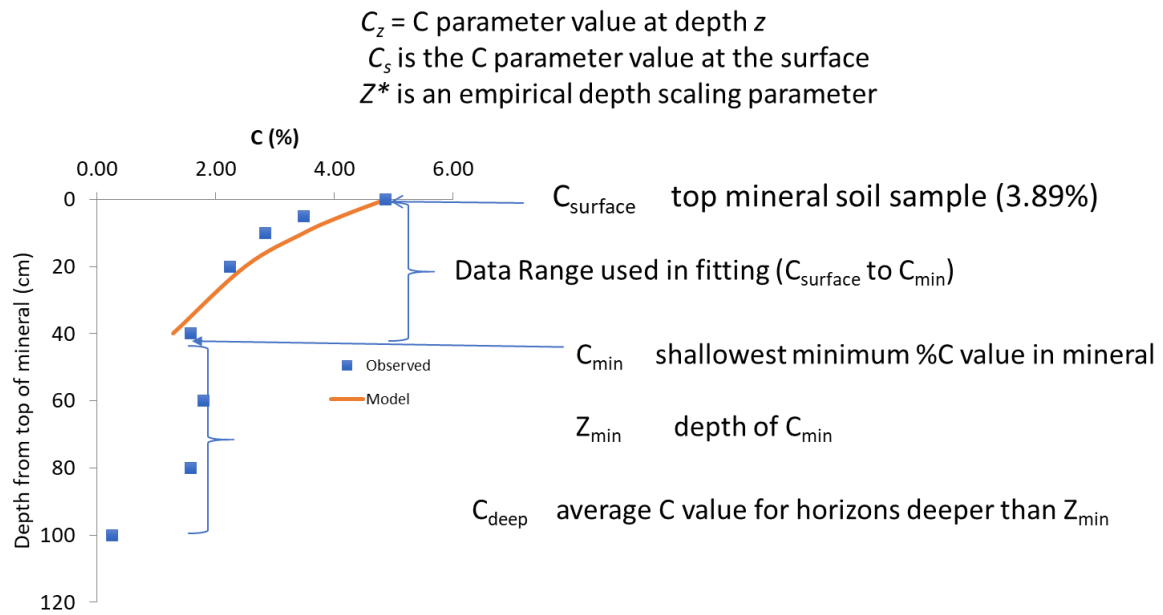

**Figure S1. Model fits for the depth attenuation of C stored in fractionated and bulk soil organic matter storage for Gelisol, Inceptisol, and Mollisol profiles based on data fits to Eq. 1**

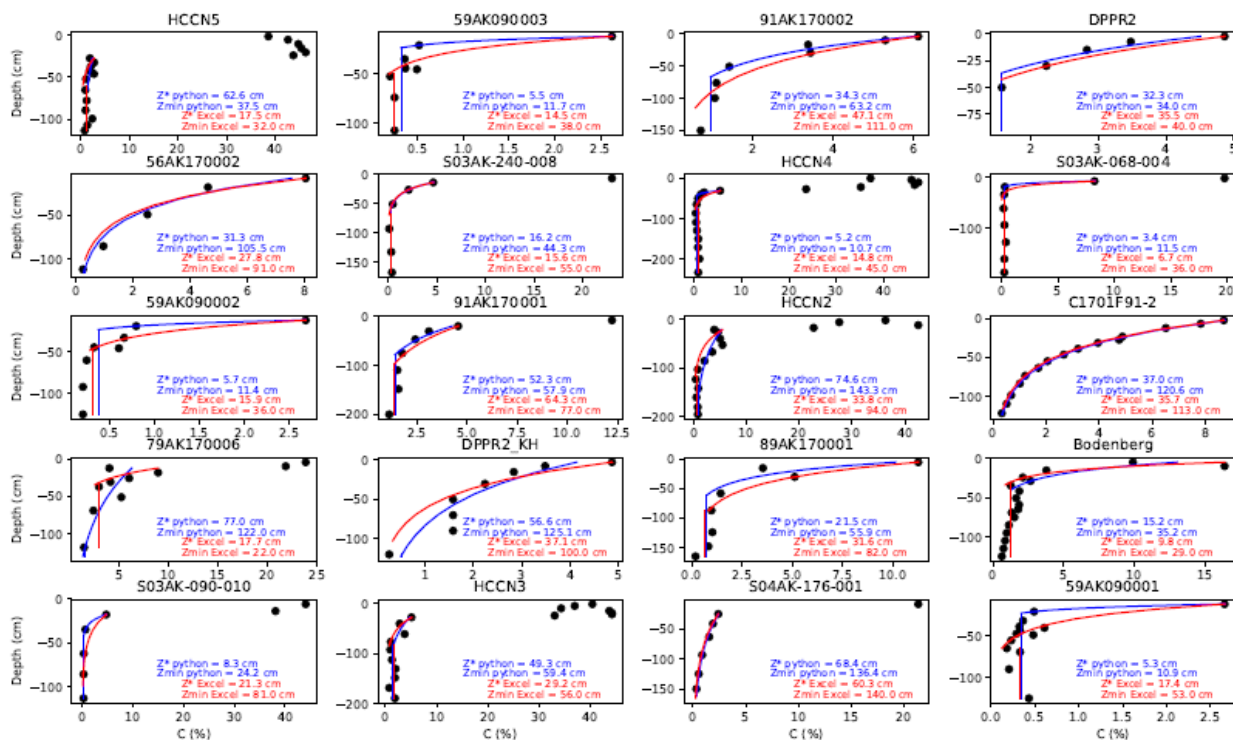

Figure S2. Comparison between Excel Solver and Python scripts for fitting Eq. 1 to soil C content (%) with depth.

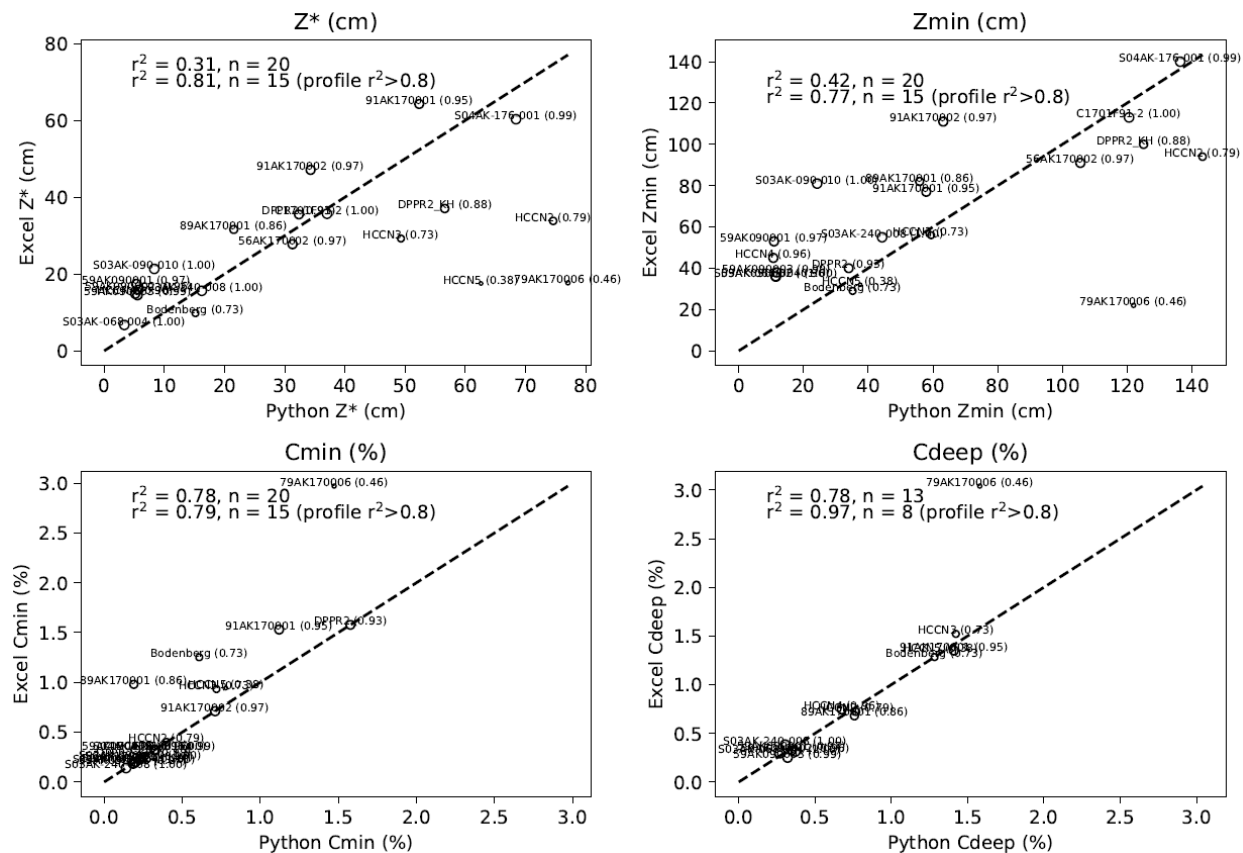

**Figure S3. Comparison of Microsoft Excel and Python output for soil profile parameters. Profiles with  $R^2 > 0.8$ , fits are plotted with larger circles indicating better fits/agreement between solver and python.**

## Model code

The follow instructions provide a standard operating procedure for running the SOLVER function in Microsoft Excel 2016.

- Here is a screenshot from Microsoft Excel the SOLVER procedure for a single soil profile.

|    | A                 | B                  | C                | D                      | E                         | F                     | G                        | H | I | J                        | K      |
|----|-------------------|--------------------|------------------|------------------------|---------------------------|-----------------------|--------------------------|---|---|--------------------------|--------|
| 1  | <b>Inceptisol</b> |                    |                  |                        | <b>C Density</b>          |                       |                          |   |   | <b>Z-Star Parameters</b> |        |
| 2  | <b>Parameter</b>  | <b>C Density</b>   |                  | <b>Slope</b>           | 1.00                      | -0.09                 | <b>y-intercept</b>       |   |   | <b>Zadj</b>              | 11.0   |
| 3  | <b>Z*</b>         | 15.2               |                  | <b>SE of Slope</b>     | 1.02                      | 1.51                  | <b>SE of y-int</b>       |   |   | <b>Z-star</b>            | 15.2   |
| 4  | <b>Surface C</b>  | 0.055              |                  | <b>R2</b>              | 0.24                      | 0.27                  | <b>SE of y-est</b>       |   |   | <b>Z-star_adj</b>        | 26.2   |
| 5  |                   |                    |                  | <b>F</b>               | 0.96                      | 3.00                  | <b>df</b>                |   |   | <b>Zmin</b>              | 22     |
| 6  |                   |                    |                  | <b>Sum of Square</b>   | 0.07                      | 0.22                  | <b>Res. Sum Squares</b>  |   |   | <b>Zmin_adj</b>          | 33     |
| 7  |                   |                    |                  |                        |                           |                       |                          |   |   | <b>C-star</b>            | 0.0204 |
| 8  |                   |                    |                  |                        |                           |                       |                          |   |   | <b>Csurface</b>          | 0.0554 |
| 9  | <b>Sample ID</b>  | <b>Basal Depth</b> | <b>Top Depth</b> | <b>Depth Below O/A</b> | <b>Observed C Density</b> | <b>Log Observed C</b> | <b>Modeled C Density</b> |   |   | <b>Cmin</b>              | 0.0270 |
| 10 | 79AK170006        | 8                  | 0                | -                      | -                         | -                     | -                        |   |   | <b>Mean Cdeep</b>        | 0.0289 |
| 11 | 79AK170006        | 11                 | 8                | -                      | -                         | -                     | -                        |   |   | <b>Std Cdeep</b>         | 0.0084 |
| 12 | 79AK170006        | 13                 | 11               | 0                      | 0.0277                    | -1.5577               | 0.0554                   |   |   |                          |        |
| 13 | 79AK170006        | 23                 | 13               | 2                      | 0.0554                    | -1.2565               | 0.0486                   |   |   |                          |        |
| 14 | 79AK170006        | 28                 | 23               | 12                     | 0.0373                    | -1.4284               | 0.0251                   |   |   |                          |        |
| 15 | 79AK170006        | 33                 | 28               | 17                     | 0.0281                    | -1.5508               | 0.0181                   |   |   |                          |        |
| 16 | 79AK170006        | 41                 | 33               | 22                     | 0.0270                    | -1.5681               | 0.0130                   |   |   |                          |        |
| 17 | 79AK170006        | 61                 | 41               | 30                     | 0.0366                    | -                     | 0.0077                   |   |   |                          |        |
| 18 | 79AK170006        | 77                 | 61               | 50                     | 0.0200                    | -                     | 0.0020                   |   |   |                          |        |
| 19 | 79AK170006        | 160                | 77               | 66                     | 0.0302                    | -                     | 0.0007                   |   |   |                          |        |
| 20 |                   |                    |                  | 15.2                   |                           |                       | 0.0204                   |   |   |                          |        |

- In cell E2, enter the following equation: =LINEST(H12:H16,F12:F16,,TRUE)
- Next, highlight cells E2:F6.
- Hit F2 function
- While those cells are highlighted, click on the equation cell above the spreadsheet where you see =LINEST(H12:H16,F12:F16,,TRUE)
- Hit Control+Shift+Enter simultaneously, and this will populate all of the stats in the array (R2, F, Sum of Square, etc.)
- Highlight cell E2 again.
- Go to SOLVER under the Data tab.
- Set Objective cell as \$E\$2
- Then set SOLVER to solver for "A value of" = 1
- Then set "By Changing Variable Cells" to \$B\$3
- Click "Solve" and then accept results if it looks right.

The following model code was developed in Python to conduct model fits to soil profile data:

```
import zstarfuncs
import pandas
from pylab import *
import glob
import os.path

org_C_cutoff=12.0

datadir='../Excel Solver fits Ak and Ia/%C fits'
datafiles=glob.glob(datadir+'/*.xlsx')
for name in datafiles.copy():
    if 'Summary' in os.path.basename(name) or os.path.basename(name).startswith('~'):
```

```

datafiles.remove(name)

def read_file(name):
    data=pandas.read_excel(name,header=8,usecols=arange(8),na_values='-')
    data.rename(columns={'Observed C%':'Observed C (%)','Top Depth, cm':'Top
Depth'},inplace=True)
    return data

out_fitting = []
out_prop    = []
out_stat    = []
failed      = []
out_method  = []
out_name    = []
out_filename=[]
for name in datafiles:
    data=read_file(name)

    layer_bot=data['Basal Depth']
    layer_top=data['Top Depth']
    Cpercent=data['Observed C (%)']

    rawdepth = 0.5*(layer_bot+layer_top)
    notNaNs = ~isnan(rawdepth) & ~isnan(Cpercent)

    depth = rawdepth[notNaNs].values; Cvalues = Cpercent[notNaNs].values;
    result = zstarfuncs.zstarfunc(depth, Cvalues, Cvalues, fit_type='piecewise',
org_C_cutoff=org_C_cutoff)

    out_prop.append(result['prop'])
    out_stat.append(result['stat'])
    out_fitting.append(result['fitting'])
    name_short=os.path.basename(name)
    name_short=name_short[:name_short.find('_Cpercent')]
    out_name.append(name_short)
    out_filename.append(name)
    print(name_short)

prop_array=asarray(out_prop)
stat_array=asarray(out_stat)
python_fits=pandas.DataFrame({
    'zstar':prop_array[:,0],
    'Csurf':prop_array[:,1],
    'Cmin' :prop_array[:,2],
    'Zmin' :prop_array[:,3],
    'Cdeep':prop_array[:,4],
    'r2'    :stat_array[:,0],
    'rmse'  :stat_array[:,1],
    'pcterr':stat_array[:,2],
    'npoints':stat_array[:,3],
    'filename':out_filename
},index=out_name)

excel_fits=pandas.read_excel(datadir+'/Z-
Star_OutputSummary_v7.xlsx',skiprows=1,usecols=arange(12),sheet='C%')
# excel_fits['Zmin']=excel_fits['Zmin']*100

# Some names in excel file don't match data file names
excel_profilenames={
    'HCCN 2':'HCCN2',
    'HCCN 3':'HCCN3',

```



```

'HCCN 4': 'HCCN4',
'HCCN 5': 'HCCN5',
# 'DPPR 3/4': None,
'KH DPPR 2': 'DPPR2_KH',
'DPPR 2': 'DPPR2',
'SO4AK-176-001': 'SO4AK-176-001'
}

excel_fits.replace(excel_profilenames, inplace=True)
excel_fits.set_index('Site ID', inplace=True)

def plot_profile(profilename, python_result, excel_result):
    data = read_file(python_result['filename'][profilename])
    depth = (data['Top Depth'] + data['Basal Depth']) * 0.5
    plot(data['Observed C (%)'], -depth, 'ko')
    zsurf = -depth.values[data['Observed C (%)'].values < org_C_cutoff][0]
    if profilename in python_result.index:
        zmin = min(python_result['Zmin'][profilename], depth.max())
        z = linspace(zsurf, -zmin + zsurf, 10)
        plot(python_result['Csurf'][profilename] * exp((z -
            zsurf) / python_result['zstar'][profilename]), z, 'b-')

    plot([python_result['Cdeep'][profilename], python_result['Cdeep'][profilename]], [-
        zmin + zsurf, -depth.max()], 'b-')
        text(0.35, 0.35, 'Z* python = %1.1f
cm'%(python_result['zstar'][profilename]), transform=gca().transAxes, fontsize='small', c
olor='b')
        text(0.35, 0.25, 'Zmin python = %1.1f
cm'%(python_result['Zmin'][profilename]), transform=gca().transAxes, fontsize='small', co
lor='b')
    else:
        print ('Warning: Profile %s not in python results'%profilename)
        if profilename in excel_result.index:
            z = linspace(zsurf, -excel_result['Zmin'][profilename] + zsurf, 10)
            plot(excel_result['Csurface'][profilename] * exp((z - zsurf) / excel_result['Z-
            star'][profilename]), z, 'r-')
            plot([excel_result['Mean Cdeep'][profilename], excel_result['Mean
            Cdeep'][profilename]], [-excel_result['Zmin'][profilename] + zsurf, -depth.max()], 'r-')
            text(0.45, 0.15, 'Z* Excel = %1.1f cm'%(excel_result['Z-
            star'][profilename]), transform=gca().transAxes, fontsize='small', color='r')
            text(0.45, 0.05, 'Zmin Excel = %1.1f
cm'%(excel_result['Zmin'][profilename]), transform=gca().transAxes, fontsize='small', col
or='r')
        else:
            print ('Warning: Profile %s not in Excel results'%profilename)
            title(profilename)

fig = figure(1, figsize=(15, 10.15)); clf()
subplots = fig.subplots(5, 4)
for num in range(len(python_fits.index)):
    ax = subplots.ravel()[num]
    sca(ax)
    plot_profile(python_fits.index[num], python_fits, excel_fits)
    if ax.get_position().x0 < 0.1:
        ax.set_ylabel('Depth (cm)')
    if ax.get_position().y0 < 0.1:
        ax.set_xlabel('C (%)')

subplots_adjust(left=0.07, bottom=0.07, right=0.95, top=0.93, hspace=0.37, wspace=0.25)
draw();

```

```

result_merged=pandas.merge(python_fits,excel_fits,left_index=True,right_index=True).dropna(subset=['Z-star','zstar'])

def plot_comparison(python_name,excel_name,yoffset=0.0,xoffset=0.0,titletext=None):
    result_good=result_merged.dropna(subset=[python_name,excel_name])
    for name in result_good.index:
        text(result_good[python_name][name],result_good[excel_name][name],'%s
(%1.2f) '%(name,result_good['r2'][name])
        ,fontsize=6,ha='center')

    plot(result_good[python_name][name],result_good[excel_name][name],'o',ms=result_good['r2'][name]*5,mfc='None',mec='k')
    zminmax=max(result_good[python_name].max(),result_good[excel_name].max())
    plot([0,zminmax],[0,zminmax],'k--')
    text(0.1+xoffset,0.9+yoffset,'r$^2$ = %1.2f, n =
%d'%(corrcoef(result_good[python_name],result_good[excel_name])[0,1]**2,len(result_good[python_name])),transform=gca().transAxes)
    text(0.1+xoffset,0.85+yoffset,'r$^2$ = %1.2f, n = %d (profile
r$^2$>0.8) '%(corrcoef(result_good[python_name][result_good['r2']>0.8],result_good[excel_name][result_good['r2']>0.8])[0,1]**2,len(result_good[python_name][result_good['r2']>0.8])),transform=gca().transAxes)
    if titletext is None:
        titletext=python_name
    xlabel('Python %s'%titletext);ylabel('Excel %s'%titletext)
    title(titletext)

figure(2);clf()
subplot(221)
plot_comparison('zstar','Z-star',titletext='Z* (cm)')

subplot(222)
plot_comparison('Zmin_x','Zmin_y',titletext='Zmin (cm)')

subplot(223)
plot_comparison('Cmin_x','Cmin_y',titletext='Cmin (%)')

subplot(224)
plot_comparison('Cdeep','Mean Cdeep',titletext='Cdeep (%)')

tight_layout()

show()

```

The following model code was developed in Python to compare Microsoft Excel and Python model fits:

```

import numpy as np

import pylab
from numba import autojit

import time

@autojit
def expfunc(x, K, I):

```

```

'''
Z* function. not forcing through Csurf.
@params: K, I
        z*      = -1/K
        csurf    = I
'''
return I*np.exp(K*x)

def linfunc(x, a, b):
'''
Z* function. not forcing through Csurf. pass in log trans pctC
z*      = -1/b
csurf    = np.exp(a)
'''
return a + b*x

@autojit
def piecewise_func(z, inv_zstar, csurf, zmax):
'''
Z* function. not forcing through Csurf.
inv_zstar is 1/z*
Constant below z=zmax
Cmin = Csurf*exp(-zmax/z*)
@params: inv_zstar, csurf, zmax
'''
out=np.zeros_like(z, dtype=float)
out[z<=zmax]=csurf*np.exp(-z[z<=zmax]*inv_zstar)
out[z>zmax]=csurf*np.exp(-zmax*inv_zstar)
return out

failcodes={-1:'No mineral soil',-2:'Less than 3 layers',-3:'No available layers',-
999:'Optimization failed'}

def zstarfunc(depth, pctC, Cvalues, fit_type = 'exp', org_C_cutoff=20.0):
'''
Pass in observations of each profile, fit func, return yhat (if plott=False),
zstar, stat
parameters:
    fit_type      : String. Current possibilities: 'exp','lin','piecewise'
                   by default, fit exponential func ('exp')
output:
    fitted value: 1-d vec
    failure code:
        -1      : no mineral soil
        -2      : layer number < 3, inside zstarfunc
        -3      : no available layer, in raw data
        -999    : optimization failed
'''
from scipy.optimize import curve_fit

# define failure code
nomin      = -1
toofewly   = -2
optifd     = -999

if min(pctC) >= org_C_cutoff: # no mineral soil layer
    return nomin
Csurf      = Cvalues[pctC<org_C_cutoff][0] # defined by not used. override with
fitted value
Zsurf      = depth[pctC<org_C_cutoff][0]
depth_mineral = depth - Zsurf # depth vec starts from Zsurf

```

```

Cmin          = np.nanmin(Cvalues)
Zmin          = np.nanmax(depth_mineral[Cvalues==Cmin])
Cdeep         = np.nanmean(Cvalues[depth_mineral>=Zmin])
if fit_type != 'piecewise':
    idx        = np.logical_and(depth_mineral >= 0, depth_mineral <= Zmin)
else:         # piecewise fit should calculate its own Zmin
    idx        = (depth_mineral >= 0)
idx           = np.logical_and(idx, Cvalues>0)
fitdepth      = depth_mineral[idx]
fitC          = Cvalues[idx]
nlayer        = fitdepth.shape[0]

if nlayer < 3:
    return toofewly

try:
    if fit_type=='exp':
        popt, pcov = curve_fit(expfunc, fitdepth, fitC, maxfev=500,
                                p0=(-0.01,fitC[0]))
    elif fit_type == 'lin':
        popt, pcov = curve_fit(linfunc, fitdepth, np.log(fitC), maxfev=500)

    elif fit_type == 'piecewise':
        popt, pcov = curve_fit(piecewise_func, fitdepth, fitC, maxfev=500,
                                p0=(0.01,fitC[0],max(fitdepth)*0.75))

    else:
        raise ValueError('fit_type %s not implemented'%fit_type)

except RuntimeError:
    return optifd

if fit_type == 'exp':
    Csurf      = popt[1]
    zstar      = -1./popt[0]
    yhat       = expfunc(fitdepth, *popt)
    prop       = [zstar,Csurf,Cmin,Zmin,Cdeep]

elif fit_type == 'lin':
    Csurf      = np.exp(popt[0])
    zstar      = -1./popt[1]
    yhat       = np.exp(linfunc(fitdepth, *popt))
    prop       = [zstar,Csurf,Cmin,Zmin,Cdeep]

elif fit_type == 'piecewise':
    Csurf = popt[1]
    zstar = 1./popt[0]
    zmax  = popt[2]
    yhat  = piecewise_func(fitdepth,*popt)
    Cdeep = Csurf*np.exp(-min(zmax,fitdepth.max())/zstar)
    prop  = [zstar,Csurf,Cmin,zmax,Cdeep]

else:
    raise ValueError('fit_type %s not implemented'%fit_type)

z_r2          = np.corrcoef(fitC, yhat)[0,1]**2
z_rmse        = np.sqrt(sum((yhat-fitC)**2))
z_pcterr      = np.mean((yhat-fitC)/fitC)

```

```
    return {'prop':prop, 'stat':[z_r2, z_rmse, z_pcterr, nlayer],  
    'fitting':[yhat,fitC,fitdepth]}
```

## References

Clark, M., D.R. Kautz. 2002. Soil Survey of the Matanuska-Susitna Valley area, Alaska. United States Department of Agriculture.

Harden, J. W., Fries, T. L., and Pavich, M. J.,: Cycling of beryllium and carbon through hillslope soils in Iowa, *Biogeochemistry*, 60, 317-336, 2002.

O'Donnell, J. A., Harden, J. W., McGuire, A. D., Kanevskiy, M. Z., Jorgenson, M. T., and Xu, X.,: The effect of fire and permafrost interactions on soil carbon accumulation in an upland black spruce ecosystem of interior Alaska: implications for post-thaw carbon loss, *Glob Change Biol*, 17, 1461-1474, doi:10.1111/j.1365-2486.2010.02358.x, 2011a.
