# Supplementary material for: Beneath the arctic greening: Will soils lose or gain carbon or perhaps a little of both?
Source: Copernicus journal article supplement (doi:10.5194/soil-2018-41), 2019-01-23
Supplement: Supplementary file 1 [file TableS1.xlsx]

## Sheet: Horizon_properties
Table S1. Horizon properties of soils analysed for radiocarbon based on archive and resampling of profiles HCCN2/3 from O'Donnell et al., 2011; Bodenburg_fractionated from Clark et al, 2002; DPPR2/3 from Harden et al, 2002.
Profile name	Layer name	Top depth (cm)	Bottom depth (cm)	Horizon label	Root Description	Moist Munsell color	Bulk density (g cm-3)	Texture class	pH in water	Organic C (%)	Total N (%)	δ13C (‰)	AMS lab	AMS year of measurement	Δ14C (‰)	Fraction modern
HCCN2/3	HCCN 2.30/HCCN 3.30	24	30	Bw	few very fine	10YR 3/2	0.736481	silt loam	6.6	4.5764	0.2412		KECK	2007	-80.99	0.93
HCCN2/3	HCCN 2.53/HCCN 3.50	30	50	Ob	few very fine		0.429293	silt loam	6.8	15.2764	0.7118		KECK	2007	-45.77	0.96
HCCN2/3	HCCN 2.68	37	68	A	few very fine		1.15492	silt loam	6.6	5.4453	0.2764		KECK	2007	-128.7	0.88
HCCN2/3	HCCN 3.81	53	81	fC	none		0.480739	silt loam	6.8	3.5012	0.1978		KECK	2007	-211.76	0.79
HCCN2/3	HCCN 3.103	68	103	fC	none		0.597502	silt loam	7	2.0333	0.1381		KECK	2007	-452.37	0.55
HCCN2/3	HCCN 2.113	93	113	fC	none		0.559438	silt loam	5.4	0.7797	0.0688		KECK	2007	-758.08	0.24
HCCN2/3	HCCN 2.133	113	133	fC	none		0.355521	silt loam	5.4	0.4003	0.0377		KECK	2007	-839.98	0.16
HCCN2/3	HCCN 2.150	133	150	fC	none		0.649621	silt loam	5.4	0.8399	0.0669		KECK	2007	-594.33	0.41
HCCN2/3	HCCN 2.170	150	170	fC	none		0.589279	silt loam	7.4	0.5116	0.0738		KECK	2007	-876.35	0.12
HCCN2/3	HCCN 2.190	170	190	fC	none		0.925752	silt loam	7	0.7531	0.0764		KECK	2007	-716.47	0.29
HCCN2/3	HCCN 2.200	190	200	fC	none		0.925752	silt	6.6	0.7841	0.0824		KECK	2007	-917.43	0.08
Bodenburg_fractionated	C1701F91-2 . OA . 0-5cm . 07-02-14	0	5	OA		7.5YR 2.5/2	0.23	silt		8.6882	-		KECK	2014
Bodenburg_fractionated	C1701F91-2 . A . 9-16cm . 07-02-14	9	16	A		10YR 3/2	0.68	silt		6.50448	-		KECK	2014
Bodenburg_fractionated	C1701F91-2 . Bw1 . 20-27cm . 07-02-14	20	27	Bw1		10YR 3/2	0.68	silt		4.86963	-		KECK	2014
Bodenburg_fractionated	C1701F91-2 . Bw2 . 28-35cm . 07-02-14	28	25	Bw2		2.5Y 4/1	1.16	silt		3.94517	-		KECK	2014	0.00137086	0.78668
Bodenburg_fractionated	C1701F91-2 . Bwb1/Ab . 43-50cm . 07-02-14	43	50	Bwb1/Ab		2.5Y 4/1	1.08	silt		2.65848	-		KECK	2014
Bodenburg_fractionated	C1701F91-2 . 60-67cm . 07-02-14	60	67			10YR 4/2		silt		1.69959	-		KECK	2014
Bodenburg_fractionated	C1701F91-2 . 80-87cm . 07-02-14	80	87				1.2	silt		1.00408	-		KECK	2014	0.000808525	0.443557
Bodenburg_fractionated	C1701F91-2 . 95-102cm . 07-02-14	95	102				1.26	silt		0.676606	-		KECK	2014
Bodenburg_fractionated	C1701F91-2 . 106-113cm . 07-02-14	106	113				1.26	silt		0.506546	-		KECK	2014	0.000776968	0.289993
DPPR2	KH DPPR2.5	0	5		many very fine and fine	10YR 2/2	0.79892	silt loam		4.8644	0.406448	-20.9	USGS; LLNL	2014	140.556	1.14056
DPPR2	KH DPPR2.10	5	10		common very fine and fine	10YR 2/2	0.904925	silt loam		3.47987	0.30383	-19	USGS; LLNL	2014	107.207	1.10721
DPPR2	KH DPPR2.20	10	20		common very fine and fine	10YR 3/2M	1.00462	silt loam		2.83222	0.249502	-17.7	USGS; LLNL	2014	27.4447	1.02744
DPPR2	KH DPPR2.40	20	40		common very fine, few fine	10YR 3/2M,3/4	1.12097	silt loam		2.2347	0.202218	-16.8	USGS; LLNL	2014	-21.6033	0.978397
DPPR2	KH DPPR2.60	40	60		common very fine	10YR 4/6M	1.05583	silt loam		1.57702	0.147891	-16.4	USGS; LLNL	2014	-56.4308	0.943569
DPPR2	Heckman composite 80	60	80		few very fine	10YR 4/6M	1.05583	silty clay loam		1.57702	0	-17.3	USGS; LLNL	2014	-224.614	0.775386
DPPR2	Heckman composite 100	80	100		few very fine	10YR 4/6M	1.05583	silty clay loam		1.57702	0	-18.7	USGS; LLNL	2014	-305	0.695
DPPR3	Heckman composite 140	100	140		few very fine		1.29814	silt loam		0.253738	0.0429025	-20.1872	USGS; LLNL	2014	-501.675	0.498325
