# Supplementary material for: Beneath the arctic greening: Will soils lose or gain carbon or perhaps a little of both?
Source: Copernicus journal article supplement (doi:10.5194/soil-2018-41), 2019-01-23
Supplement: Supplementary file 3 [file TableS2.xlsx]

## Sheet: Fraction_properties
Table S2. Properties of density fractions from soils analysed for radiocarbon based on archive and resampling of profiles HCCN2/3 from O'Donnell et al., 2011; Bodenburg_fractionated from Clark et al, 2002; DPPR2/3 from Harden et al, 2002.
Bulk sample that was fractionated	Density fraction type	Lower density cutoff (g cm-3)	Upper density cutoff (g cm-3)	Proportion of sample mass (%)	Proportion of sample C (%)	Organic C (%)	Total N (%)	δ13C (‰)	AMS lab	AMS sample code	AMS year of measurement	Δ14C (‰)	Δ14C analytical error (‰)	Fraction modern	Fraction modern analytical error (‰)
HCCN 2.30/HCCN 3.30	free light	0	1.65	2.89399	19.4144	31.1286	0.8207	-26.8	CAMS	163823	2013	6.4	2.6	1.0141	0.0026
HCCN 2.53/HCCN 3.50	free light	0	1.65	3.63026	21.673	33.3452	0.7643	-26.6	CAMS	163824	2013	3.6	2.9	1.0113	0.0029
HCCN 2.68	free light	0	1.65	1.27625	10.6817	29.6135	0.8759	-26	CAMS	163825	2013	-104.3	2.8	0.9025	0.0028
HCCN 3.81	free light	0	1.65	0.356355	10.4606	30.1567	0.886692	-26.2	CAMS	163826	2013	-164.7	2.4	0.8416	0.0024
HCCN 3.103	free light	0	1.65	0.356286	11.2646	30.1567	0.886692	-26.12	CAMS	164900	2014	-334.684	1.79707	0.670487	0.00179707
HCCN 2.133	free light	0	1.65	0.061894	4.57431	30.1567	0.886692	-25.55	CAMS	164901	2014	-635.627	1.29276	0.367205	0.00129276
HCCN 2.170	free light	0	1.65	0.0782472	4.71431	31.3884	0.93665	-25.48	CAMS	164902	2014	-646.733	1.34513	0.356013	0.00134513
HCCN 2.200	free light	0	1.65	0.331625	8.3043	20.0467	0.5813	-29.65	CAMS	164903	2014	-120.105	2.14136	0.886733	0.00214136
HCCN 2.30/HCCN 3.30	occluded light	0	1.65	0.608836	5.6501	43.0613	0.9778	-27.2	CAMS	163827	2013	-106.7	2.5	0.9001	0.0025
HCCN 2.53/HCCN 3.50	occluded light	0	1.65	2.39055	17.1442	40.0562	0.8678	-26.1	CAMS	163828	2013	-89.8	2.6	0.9171	0.0026
HCCN 2.68	occluded light	0	1.65	0.04754	0.468403	34.8617	0.824	-26	CAMS	163829	2013	-216	2.7	0.79	0.0027
HCCN 3.81	occluded light	0	1.65	0.522184	12.7055	24.9966	0.7038	-26.8	CAMS	163830	2013	-318.5	1.9	0.6867	0.0019
HCCN 3.103	occluded light	0	1.65	0.350224	5.26252	14.3323	0.4546		CAMS	164904	2014	-434.902	2.38094	0.56949	0.00238094
HCCN 2.133	occluded light	0	1.65	0.0172633	1.33106	31.4616	0.7656
HCCN 2.170	occluded light	0	1.65	0.0158219	0.955471	31.4616	0.7656
HCCN 2.200	occluded light	0	1.65	0.0422694	1.66119	31.4616	0.7656		CAMS	164905	2014	-800.632	1.23237	0.200917	0.00123237
HCCN 2.30/HCCN 3.30	heavy	1.65	Inf	96.4972	74.9355	2.67295	0.1444	-26	CAMS	163831	2013	-163	2.4	0.8434	0.0024
HCCN 2.53/HCCN 3.50	heavy	1.65	Inf	93.9792	61.1828	4.7105	0.2242	-25.7	CAMS	163832	2013	-136.5	2.6	0.8701	0.0026
HCCN 2.68	heavy	1.65	Inf	98.6762	88.8499	3.3616	0.174	-25.8	CAMS	163833	2013	-221.5	2.6	0.7845	0.0026
HCCN 3.81	heavy	1.65	Inf	99.1215	76.8339	1.4439	0.0963	-24	CAMS	163834	2013	-483.8	1.5	0.5201	0.0015
HCCN 3.103	heavy	1.65	Inf	99.2935	83.4729	0.9243	0.0643	-20.72	CAMS	164906	2014	-691.378	1.43428	0.31102	0.00143428
HCCN 2.133	heavy	1.65	Inf	99.9208	94.0946	1.002	0.0387	-12.01	CAMS	164907	2014	-877.31	1.24469	0.123643	0.00124469
HCCN 2.170	heavy	1.65	Inf	99.9059	94.3302	1.0366	0.0503	-11.9	CAMS	164908	2014	-940.769	1.29064	0.0596913	0.00129064
HCCN 2.200	heavy	1.65	Inf	99.6261	90.0345	0.8746	0.0411	-17.63	CAMS	164909	2014	-947.829	1.30021	0.0525764	0.00130021
C1701F91-2 . OA . 0-5cm . 07-02-14	free light	0	1.65	15.0533	35.9953	35.418	1.3413				2016	35.418	1.3413
C1701F91-2 . A . 9-16cm . 07-02-14	free light	0	1.65	3.10021	21.1522	22.9621	0.8417				2016	22.9621	0.8417
C1701F91-2 . Bw1 . 20-27cm . 07-02-14	free light	0	1.65	1.77415	22.5045	20.9615	0.7665				2016	20.9615	0.7665
C1701F91-2 . Bw2 . 28-35cm . 07-02-14	free light	0	1.65	0.676213	9.91291	14.1236	0.5983				2016	14.1236	0.5983
C1701F91-2 . Bwb1/Ab . 43-50cm . 07-02-14	free light	0	1.65	0.521351	11.2713	19.0746	0.8379				2016	19.0746	0.8379
C1701F91-2 . 60-67cm . 07-02-14	free light	0	1.65	0.104467	1.39398	35.7464	1.0085				2016	35.7464	1.0085
C1701F91-2 . 80-87cm . 07-02-14	free light	0	1.65	0.0629277	3.70427						2016
C1701F91-2 . 95-102cm . 07-02-14	free light	0	1.65	0.0929045	5.06827	40.683	1.0619				2016	40.683	1.0619
C1701F91-2 . 106-113cm . 07-02-14	free light	0	1.65	0.126439	12.4977	46.5147	1.0625				2016	46.5147	1.0625
C1701F91-2 . OA . 0-5cm . 07-02-14	occluded light	0	1.65	18.2614	44.3159	35.9447	1.02479				2016
C1701F91-2 . A . 9-16cm . 07-02-14	occluded light	0	1.65	1.64036	18.4876	37.9305	1.25545				2016	0.981736	0.00153092
C1701F91-2 . Bw1 . 20-27cm . 07-02-14	occluded light	0	1.65	0.272026	6.1867	37.5831	1.1783				2016	0.855349	0.00140455
C1701F91-2 . Bw2 . 28-35cm . 07-02-14	occluded light	0	1.65	0.155295	3.98539	24.7253	1.0129				2016	0.7	0.00116539
C1701F91-2 . Bwb1/Ab . 43-50cm . 07-02-14	occluded light	0	1.65	0.122639	4.99635	35.9447	1.02479				2016	0.696744	0.00129538
C1701F91-2 . 60-67cm . 07-02-14	occluded light	0	1.65	0.1357	2.20552	43.5399	0.6525				2016	0.4241	0.000838221
C1701F91-2 . 80-87cm . 07-02-14	occluded light	0	1.65	0.194027	12.5992	32.4708	0.7622				2016	0.191461	0.000780256
C1701F91-2 . 95-102cm . 07-02-14	occluded light	0	1.65	0.149502	7.20594	35.9447	1.02479				2016	0.0748502	0.00064203
C1701F91-2 . 106-113cm . 07-02-14	occluded light	0	1.65	0.10136	7.74211	35.9447	1.02479				2016	0.0805145	0.00064585
C1701F91-2 . OA . 0-5cm . 07-02-14	heavy	1.65	Inf	66.6854	19.6889	4.3732	0.2607				2016
C1701F91-2 . A . 9-16cm . 07-02-14	heavy	1.65	Inf	95.2594	60.3601	2.1325	0.12				2016	0.954945	0.00155634
C1701F91-2 . Bw1 . 20-27cm . 07-02-14	heavy	1.65	Inf	97.9538	71.3088	1.203	0.0714				2016	0.847657	0.0013964
C1701F91-2 . Bw2 . 28-35cm . 07-02-14	heavy	1.65	Inf	99.1685	86.1017	0.8365	0.0561				2016	0.732161	0.00116332
C1701F91-2 . Bwb1/Ab . 43-50cm . 07-02-14	heavy	1.65	Inf	99.356	83.7323	0.74355	0.06285				2016	0.71192	0.00117834
C1701F91-2 . 60-67cm . 07-02-14	heavy	1.65	Inf	99.7598	96.4005	2.58869	0.0628929				2016
C1701F91-2 . 80-87cm . 07-02-14	heavy	1.65	Inf	99.743	83.6965	0.4196	0.0391				2016	0.472037	0.000999178
C1701F91-2 . 95-102cm . 07-02-14	heavy	1.65	Inf	99.7576	87.7258	0.6558	0.05				2016
C1701F91-2 . 106-113cm . 07-02-14	heavy	1.65	Inf	99.7722	79.7602	0.3762	0.0408				2016	0.326664	0.000780453
KH DPPR2.5	free light	0	1.65	1.76705	7.82885	22.5895	1.0148	-24.51	CAMS	164622	2014	127.675	3.94474	1.13701	0.00394474
KH DPPR2.10	free light	0	1.65	1.271	4.63089	13.1045	0.5119	-19.41	CAMS	164623	2014	184.107	4.17811	1.20015	0.00417811
KH DPPR2.20	free light	0	1.65	0.282154	1.99587	21.6579	0.5666	-21.26	CAMS	164624	2014	131.67	4.47373	1.14484	0.00447373
KH DPPR2.40	free light	0	1.65	0.537027	4.057	17.435	0.3529	-19.75	CAMS	164625	2014	97.6109	4.95228	1.1121	0.00495228
KH DPPR2.60	free light	0	1.65	0.349691	3.69828	16.9612	0.2465	-16.04	CAMS	164626	2014	126.378	3.98013	1.14556	0.00398013
Heckman composite 80	free light	0	1.65	0.186279	3.88168	15.5623	0.2086	-17.83	CAMS	164627	2014	129.752	3.9857	1.1469	0.0039857
Heckman composite 100	free light	0	1.65	0.225233	15.1816	30.4513	1.6399
Heckman composite 140	free light	0	1.65	0.167363	23.4154	25.2347	1.185		CAMS	165123	2014	98.8	4.3
KH DPPR2.5	occluded light	0	1.65	0.266204	1.58987	10.2139	0.6082	-23.52	CAMS	164628	2014	138.477	4	1.14907	0.00399404
KH DPPR2.10	occluded light	0	1.65	0.0987985	0.69318	28.2133	0.9789
KH DPPR2.20	occluded light	0	1.65	0.181156	0.60433	2.4167	0.0765	-20.2	CAMS	164629	2014	27.0578	3.6	1.04014	0.00360832
KH DPPR2.40	occluded light	0	1.65	0.0254515	0.311139	0.4032	0		CAMS	165126	2014	30.5298	4.6	1.03854	0.00455257
KH DPPR2.60	occluded light	0	1.65	0.300532	0.452868
Heckman composite 80	occluded light	0	1.65	0.316929	0.171106
Heckman composite 100	occluded light	0	1.65	0.0149702	1.09642
Heckman composite 140	occluded light	0	1.65	0.00204101	0.310279
KH DPPR2.5	heavy	1.65	Inf	97.9667	90.5813	3.3178	0.2587	-20.68	CAMS	164614	2014	112.823	3.94463	1.12644	0.00394463
KH DPPR2.10	heavy	1.65	Inf	98.6302	94.6759	2.4306	0.1948	-18.91	CAMS	164615	2014	60.038	3.73354	1.07495	0.00373354
KH DPPR2.20	heavy	1.65	Inf	99.5367	97.3998	2.3065	0.1893	-17.61	CAMS	164616	2014	-23.1489	3.44645	0.991904	0.00344645
KH DPPR2.40	heavy	1.65	Inf	99.4375	95.6319	1.5008	0.1202	-16.95	CAMS	164617	2014	-105.105	3.16456	0.909296	0.00316456
KH DPPR2.60	heavy	1.65	Inf	99.3498	95.8488	1.1761	0.1017	-16	CAMS	164618	2014	-176.25	3.9127	0.837815	0.0039127
Heckman composite 80	heavy	1.65	Inf	99.4968	95.9472	0.5162	0.0528	-16.89	CAMS	164619	2014	-288.075	2.59039	0.723425	0.00259039
Heckman composite 100	heavy	1.65	Inf	99.7598	83.7219	0.3273	0.0394	-18.64	CAMS	164620	2014	-389.321	2.31302	0.61944	0.00231302
Heckman composite 140	heavy	1.65	Inf	99.8306	76.2743	0.1889	0.0315	-21.24	CAMS	164621	2014	-558.944	1.89739	0.446198	0.00189739
